# Supplementary material for: Seed Moisture Isotherms, Sorption Models, and Longevity
Source: Front Plant Sci. 2022 Jun 2;13:891913. doi: 10.3389/fpls.2022.891913 (PMC9201756; doi:10.3389/fpls.2022.891913)
Supplement: Supplementary file 1 [file Table_1.xls]

## Sheet: Supplementary Table 1
Supplementary Table 1 Compilation of seed isotherms from the literature outlining the methodology, modelling and conclusions. The table is subdivided into three sections: (i) isotherms from the seed science literature where the main focus has been to relate the isotherm(s) to physiological response; (ii) isotherms determined to understand drying and storage of seeds as a commodity; and (iii) isot…
Species	Objective	Equilibration method and duration	Method for (e)RH / aw determination	Method for water content determination	Direction	Initial moisture status (and pretreatment)	Temp. (°C)	Number of points (for each isotherm)	Equations fitted (where different equations were evaluated, the best-fit is shown in bold)	Conclusions	Isotherm references	Oil content (%) (oil content references)
Physiological response
Mung bean (Vigna mdiata L.) Wilczek, sliced control and primed seeds	Desiccation tolerance	Saturated salt solutions, 8-10 days	Using salt solutions' water activity	95-100°C, 24h	Desorption	NA	16	≈ 17	D'Arcy-Watt	Molecular mobility enhancement in seeds probably accelerates seed deterioration and decreases storage stability	Sun et al. (1997)	0.95 (Eckey, 1954; Earle and Jones, 1962; Barclay and Earle, 1974)
Pea (Pisum sativum L.), cotyledon, axis	Physical status of water in seeds	Saturated solutions	Reference values	95°C, 5d	Desorption	Initial (all cases): ≈ 0.35 (d.w.) MC	5, 15, 25, 35	≈ 25	D’Arcy-Watt	Changes in the sorption characteristics (as reflective of the chemical composition of the biological materials) with temperature and hydration level may alter hydration-induced structural in cellular components	Vertucci and Leopold (1987)	1.23 (Earle and Jones, 1962; Barclay and Earle, 1974)
Fava bean (Vicia faba L.), cotyledon, axis	Physical status of water in seeds	Saturated solutions	Reference values	95°C, 5d	Desorption	Initial (all cases): ≈ 0.35 (d.w.) MC	5, 15, 25, 35	≈ 25	D’Arcy-Watt	Changes in the sorption characteristics (as reflective of the chemical composition of the biological materials) with temperature and hydration level may alter hydration-induced structural in cellular components	Vertucci and Leopold (1987)	1.63 (Hacıseferoǧulla et al., 2003)
Rice (Oryza sativa)	Longevity	Stepped drying in RH-controlled environments; 7-10 days	Water activity meter	130°C, 2h ISTA, (2015)	De- ® adsorption	Fresh harvest: 24% (f.w.) MC/ ≈ 95 % RH	15	≈ 9	Modified D’Arcy-Watt	At a given eRH, the longevity of adsorbing seeds was greater than that of desorbing seeds; hysteresis effect observed	Hay and Timple (2016)	2.2 (Eckey, 1954)
Rice (Oryza sativa);	Drying behaviour	Stepped drying in RH-controlled environments	Water activity meter	130°C, 2h	Desorption	Fresh harvest: between 67.8-96.9% RH	20.8-24.7	NA	D’Arcy-Watt	Freshly harvested seeds could still be metabolically active and be in the first stage of the post-mass maturity, desiccation phase of seed development, and thus able to increase longevity in response to hot-air drying	Whitehouse et al. (2015)	2.2 (Eckey, 1954)
Coffee (Coffea spp.) seeds, embryos	Desiccation tolerance	Saturated salt solution; 2-6 weeks (seeds)/ 4-7 day (excised embryos)	Reference values	95°C, 36h (embryos)/ 5 d (seeds)	Desorption	Fresh: 0.18 (d.w.); aged to death seeds	5, 15, 25	7	NA	In whole seeds, MC/ RH relationships and the effect of temperature on these relationships were mostly typical of orthodox seeds; desiccation sensitivity or poor longevity is linked with low levels of water sorption at relative humidities less than 25%	Eira et al. (1999)	9.75 (Eckey, 1954; Padley et al., 1994)
Ground soybean embryos	Imbibition process	Saturated salt solutions	Reference values	Gravimetrically determined	Adsorption	NA	5, 20	20-23	NA	Water binding interactions on macromolecule surfaces are reflected in dynamic characteristics of imbibing seeds	Vertucci and Leopold, (1984)	19.56 (Eckey, 1954; Earle and Jones, 1962; Vaughan, 1970; Padley et al., 1994)
Soybean (Glycine max L.), cotyledon, axis	Physical status of water in seeds	Saturated salt solutions	Reference values	95°C, 5d	Desorption	Initial (all cases): ≈ 0.35 (d.w.) MC	5, 15, 25, 35	≈ 25	D’Arcy-Watt	Changes in the sorption characteristics (as reflective of the chemical composition of the biological materials) with temperature and hydration level may alter hydration-induced structural in cellular components	Vertucci and Leopold, (1987)	19.56 (Eckey, 1954; Earle and Jones, 1962; Vaughan, 1970; Padley et al., 1994)
Soybean (Glycine max L.)	Low water contents effects on physiological activities	Saturated solutions	Reference values	95°C, 5d	Desorption	Initial: ≈ 0.35 (d.w.) MC	5	15	NA	Physiological activity changes of seeds that occur at discrete moisture levels are reflective of discrete changes in the thermodynamic properties of water	Vertucci (1989)	19.56 (Eckey, 1954; Earle and Jones, 1962; Vaughan, 1970; Padley et al., 1994)
Lettuce (Lactuca sativa)	Longevity	Saturated solutions	Reference values	95°C, 5d	Desorption	Manipulated, initial: 75% RH	5, 15, 25, 35, 45	≈ 12	NA	Lettuce seeds must be dried to very low water contents to achieve their maximum shelf life if stored in 50°C; however, this extreme drying is not necessary if seeds are to be stored at 35°C; reverse-sigmoidal shape curve	Walters et al. (1998)	37.7 (Earle and Jones, 1962)
Sunflower seeds, embryonic axes, cotyledons	Dormancy release	Saturated salt solutions	Reference values	105°C, 2d	NA	NA	5, 15, 20, 25, 30	9	Adapted D’Arcy-Watt	Oxidation changed water binding properties associated with dormancy release.	Bazin et al. (2011)	41.54 (Eckey, 1954; Earle and Jones, 1962; Barclay and Earle, 1974; Robertson and Greene 1981; Rawson et al., 1984; Padley et al., 1994)
Caladenia arenicola, C. flava, C. huegelii, Diuris laxiflora, Microtismedia ssp. Media, Pterostylis recurva, P. sanguinea, Thelymitra crinite, T.macrophylla.	Longevity	Stepped drying in RH-controlled environments	NA	NA	Ad- ® desorption	NA	23	≈ 18	NA	Automatedly determined moisture adsorption and desorption isotherms were equate to the tolerance of drying to 0.03-0.06 g water g-1 dry weight or 0.013-0.028 g water g-1 dry weight, respectively	Hay et al. (2010)	_
Reference material	Quantifying sorption hysteresis	Reference values	Reference values	Reference values	De-, adsorption	Reference values	Reference values	Reference values	Langmuir, BET, Harkins-Jura, GAB, Hailwood-Harrobin, Oswin, Smith, Halsey, Henderson, Kuhn, Chung-Pfost, Caurie, Mizrahi et al., Chen	A theoretical hysteresis model was verified with published hysteresis data to predict the hysteresis loop of food material	Yang et al. (1997)	_
Drying / storage (food seeds)
Lentils (Lens culinaris)	Storage	Saturated solutions	Reference values	70°C, 6h	De-, adsorption	Freshly harvest seeds kept 6 month in dry room; Ad: dehydrated < 1% (d.w.) MC; De: hydrated 29% (d.b.) MC	5, 20, 40, 60	10	Modifed- Chung-Pfost, modified-Halsey, modified-Oswin, modified- Henderson, GAB	Regardless of the temperature, lentil seeds have a monolayer moisture content when stored at 0.16- 0.17 relative humidity	Menkov (2000)	0.8 (Earle and Jones, 1962)
Mungbean (Vigna radiata L.)	Drying	Saturated salt solutions	Reference values	105°C, 24h	Desorption	Initial: 8.7% (d. b.) and additional samples rehydrated to 17.93, 24.20, 37.04% (d. b.) MC	35, 45, 55	6	Henderson, Chung-Pfost, Halsey, Sehgal, G.A.B.	Initial moisture content seemed to influence the EMC of mungbean	Silakul and Jindal (2002)	0.95 (Eckey, 1954; Earle and Jones, 1962; Barclay and Earle, 1974)
Pea (v. Tainun no. 1)	Drying; proposing a model to calculate the isosteric heat by isotherm equations directly, (EMC/ERH to EMC/Q^s (Q^s: latent heat of vaporization))	Reference method	Reference values	Reference values	Desorption	Reference values	Reference values	Reference values	Modified-Henderson, Chung-Pfost, modified-Halsey, modified-Oswin,	The sorption isosteric heat can be expressed as a function of temperature and moisture content that are derived from the Aw model directly	Chen (2006)	1.23 (Earle and Jones, 1962; Barclay and Earle, 1974)
Pea (v. Tainun no. 1)	Drying	Saturated solutions	NA	Referenced ASAE, 1996	De-, ad-, desorption	Rewetted: initial 32% (d.b.) MC	25, 50	≈ 10	GAB, modified-Henderson, Chung-Pfost, modified-Oswin,modified-Halsey	Hysteresis; no universal or best ERH/EMC model was found	Chen (2003)	1.23 (Earle and Jones, 1962; Barclay and Earle, 1974)
Araticum (Annona crassiflora Mart.)	Drying	Step-drying at 40°C, 22.4% RH to obtain various MC values	Water activity meter	105±3°C, 24h	Desorption	Fresh harvest: 16% (d.b.)	10, 20, 30, 40	5	Chung-Pfost, Copace, modified- GAB, modified-Henderson, modified- Oswin, Sabbah, Sigma-Copace	The isosteric heat increased with the reduction in moisture content	Ferreira Junior et al. (2020)	2.14 (Lopes et al., 2012)
Rice (Oryza sativa L.)	Storage	Saturated solutions	NA	105± 1°C, 24h	De- ® adsorption	De: fresh, 0.28 (d.b.); Ad: dehydrated at 40 ºC, 0.17 (d.b.)	10, 20, 30, 40, 50	4	Modified- Henderson, modified-Halsey, modified-Oswin, Copace, Sigma-Copace, Chung-Pfost, Smith, Harkins-Jura	Hysteresis effect, sigmoidal shape and type II curve observed	Zeymer et al. (2019)	2.2 (Eckey, 1954)
Rice (Oryza sativa, Oryza glaberrima)	Storage	Saturated solutions; more than 2 weeks	NA	130°C, 24h	Desorption	NA	15, 25, 35, 45	8	GAB	Enthalpy mechanism was more extended than that controlled by the entropy	Wang et al. (2017)	2.2 (Eckey, 1954)
Wheat (Triticum spp.)	Drying	Saturated solutions	Reference values	103±0.5°C, 22-28h	De-, adsorption	Both fresh and rewetted: Rewetted: Ad: dried the wet bulk at 40.5°C to below 5% (f.w.) MC; De: re-hydrated to 23% (f.w.) MC and equilibrated at 4°C for two weeks; Fresh; (different varieties to compare): De: 19.5% (f.w.) MC	10, 20, 25, 30, 35	9	Chen-Clayton, modified-BET, modified-Chung-Pfost, modified-Henderson, modified-Oswin, Strohman-Yoerger	The hysteresis loop decreased with increasing temperature, but was not influenced by the hardness of wheat varieties; the sorption isosteric heat difference between hard and soft wheat was very small regardless of temperature	Li et al. (2011)	2.2 (Eckey, 1954)
Yellow-dent corn	Drying	A rapid method for collecting ERH data using temperature- controlled setup, 6-18h; Saturated solutions	Electric hygrometer	103°C, 72h	De-, adsorption	Both fresh and rewetted: De: rehydrating; Ad: dehydrating	5, 15, 25, 35, 45	≈ 15	Modified-Henderson, Chung-Pfost, modified-Oswin, modified- Halsey, Chirife	Significantly different isotherms for different varieties and years grown; hysteresis decreases as the sorption temperature increases; the water adsorbing ability decreases as the drying temperature increases; the interaction of drying treatment and rewetting significantly affects moisture sorption properties	Chen and Morey, (1989)	5.75 (Eckey, 1954; Padley et al., 1994)
Maize grains:	Drying	Saturated solutions	Reference values	102°C, 24h	Desorption	NA	30, 40, 50, 60	9	GAB	Higher water activity values at the constant moisture content when temperature is increased; the net isosteric heat decreased exponentially with an increase in moisture	Talla (2014)	5.75 (Eckey, 1954; Padley et al., 1994)
Corn, starch	Drying	Reference method	Reference values	Reference values	Desorption	Reference values	Reference values	Reference values	GAB	The characteristics of the different classes of water as well as the transition between them can be deduced from the GAB sorption isotherm	Quirijns et al. (2005b)	5.75 (Eckey, 1954; Padley et al., 1994)
Corn, starch	Drying	Saturated solutions; a few weeks	Reference values	103± 1°C until equilibrium was reached (±1mg in successive weighings)	Desorption	Corn: 2.6 (kg kg−1 dm) MC; starch: 0.97 (kg kg−1dm) MC	30, 45, 60, 70 (Corn); 30, 45, 60 (starch)	≈ 12	GAB	The sorption data can be best predicted by direct regression based on weighed SSQ at different temperatures and low water activity	Quirijns et al. (2005a)	5.75 (Eckey, 1954; Padley et al., 1994)
Pearl millet (Pennisetum glaucum)	Drying	Saturated solutions; 7 and 12 days	Reference values	103± 2°C, until constant weight was obtained (ASAE, 1983)	De-, adsorption	Rewetted: initial: 10.08% (d.b.) MC, the bulk divided into two groups; De: rehydrated to 32.02% (d.b.) MC; Ad: dried to 5.87% (d.b.) MC	30, 40, 50, 60, 70	10	Modified- Henderson, modified- Chung-Pfost, modified- Halsey, modified-Oswin, modified- GAB	Hysteresis of type III increases with an increase in temperature as result of the hard nature of the millet, sigmoidal shape	Raji and Ojediran, (2011)	5.78 (Earle and Jones, 1962)
Prickly pear (Opuntia ficus-indica)	Drying	Saturated solutions; 15 days	Reference values	105± 1°C, 4h	Desorption	Fresh: 1.2 (kg water per kg of dry matter)	40, 60, 70	8	GAB, Oswin, Dent, Henderson, Halsey	Type III curve, net isosteric heat of desorption and differential entropy decrease with increasing moisture content, the thermodynamic properties are essential in seeds drying and storage	Hassini et al. (2015)	6.3 (Eckey, 1954)
Quinoa (Chenopodium quinoa Willd.)	Storage	Saturated solutions	Reference values	AOAC, 1990	De-, adsorption	Ad: dehydrated 0.12 (d.b.) MC; De: rehydrated 0.62 (d.b.) MC	20, 40, 60	9	GAB, BET, Caurie, Henderson, Oswin, Halsey, Smith, Iglesias–Chirife	Hysteresis effect; the equilibrium moisture content increased with decreasing temperature at constant water activity; Heat of sorption decreased with the increasing equilibrium moisture content for adsorption isotherms	Miranda et al. (2012)	7.25 (Earle and Jones, 1962)
Grapes (Vistis vinifer L., cv. Seiahe-Shiraz)	Drying	Saturated solutions; 7 days	Reference values	95ºC, 5h	Desorption	Fresh	35, 45, 55, 65	6	Modified- Henderson, modified- Chung-Pfost, modified- Halsey, modified- Oswin, modified- GAB	The net isosteric heat, isosteric heat, differential entropy, net equilibrium enthalpy, equilibrium enthalpy and integral entropy decreased with moisture content	Majd et al. (2013)	14 (Majd et al., 2013)
Pepper (Capsicum frutescens L.)	Storage	NA	NA	105±3°C, 24h	De- ® adsorption	Fruits harvested in 2011; De: 46.0% (d.b.) MC; Ad: dehydrated to 2.5% (d.b.) MC	30, 40, 50	NA	Modified-Oswin	The hysteresis reduces with increasing temperature; enthalpy, entropy, Gibbs free energy increase with reducing the moisture content; the enthalpy-entropy compensation theory is valid; the sorption of water between seeds and the surrounding air is a non-spontaneous process	Silva et al. (2018)	19.93 (Earle and Jones, 1962; Gunstone et al., 1972)
Castor beans (cv. Guarani)	Storage, drying	An atmosphere control unit	Psychrometer next to samples (monitoring relative humidity and temperature)	105±1°C, 24h	De- ® adsorption	Fresh harvest: De: 82% (d.b.) MC; Ad: 2.5% (d.b.) MC	25, 35, 45, 55	4	Chung- Pfost, Copace, modified- Halsey, modified- Henderson, modified- Oswin, modified- GAB	Hysteresis effect at all temperatures	Goneli et al. (2016)	21.95 (Eckey, 1954; Earle and Jones, 1962; Jones and Earle, 1966; Vaughan, 1970; Padley et al., 1994)
Chili pepper (Capsicum baccatum)	Drying	Saturated solutions; 96h	Reference values	Analytical standards IAL (2005)	Desorption	Fresh fruit seeds	30, 55, 70	4	Modified Chung-Pfost, Copace, modified- GAB, modified- Halsey, Henderson, modified- Henderson, Oswin, Sabbah, Sigma-Copace, GAB, Peleg, modified- BET, Smith, Andrade	At lower equilibrium moisture contents, the energy needed to remove water from the product is greater	Andrade et al. (2017)	23.5 (Jarret et al., 2013)
Tomato seeds	Drying	Saturated solutions	Reference values	103°C, 24h	Desorption	Fresh seeds dried: initial 268 % (d.b.) MC	30, 40, 50, 60, 70	4	Henderson, Oswin, Halsey, Chung–Pfost, Smith	Page’s equation adequately described the drying, the drying time decreased for the lower tray loads and higher air temperatures	Sogi et al. (2003)	24.4 (Eller et al., 2010)
Chia (Salvia hispanica L.) seed, flour	Storage	Saturated solutions	Reference values	70°C and 15kPa AOAC (1995)	Adsorption	Initial: 4.9% (d.b.) MC; Ad: dehydrated	20, 35, 50, 65	9	GAB	Sigmoidal shape and type II curve; based on the net isosteric adsorption heat data, water molecules are strongly adsorbed below 0.05 kg (kg d.b.)−1	Moreira et al. (2012)	29 (Hagemann et al., 1967)
Black chia	Storage	Saturated solutions	Water activity meter	105°C until to a constant weight reached	Adsorption	Dehydrated to 19% RH, 1.76 (gH2O/100g) MC	15, 25, 35	9	BET, GAB, Halsey, Henderson, Iglesias-Chirife, Caurie, Oswin, Peleg, Smith, White- Eiring	The adsorption surface area decreased by increasing temperature; the isosteric heat decreased by increasing moisture content; sigmoidal shape and type II curve observed	Arslan-Tontul (2020)	34 (Arslan-Tontul, 2020)
Melon (Cucumis melo L.)	Drying	Saturated solutions; 3 or 4 weeks	NA	Referenced (AOAC, 1997)	De- ® adsorption	De: fresh harvest; Ad: dehydrated at 40°C, 24h, 3% (d.b.) MC	30, 40, 60	10	Smith, Caurie, Peleg, White and Eiring, GAB, BET, Adam and Shove	Hysteresis effect, sigmoidal shape and type II curve observed	Mallek-Ayadi et al. (2020)	36.25 (Eckey, 1954; Padley et al., 1994; Schippers, 2000)
Lettuce (Lactuca sativa)	Storage	Saturated solutions	Reference values	105±1°C, 24h	Desorption	Initial: 9.51% (d.b.) MC	10, 20, 30, 40, 50	6	Chung-Pfost, Copace, Henderson, modified- Henderson, modified-Halsey, modified-Oswin	Increased temperature promotes the reduction in equilibrium moisture content for a constant water activity, sigmoidal shape and type II curve	Zeymer et al. (2017)	37.7 (Earle and Jones, 1962)
Lettuce (Lactuca sativa L.)	Drying	Saturated solutions	Reference values	105±3°C, 24h	Desorption	NA	30, 40, 50, 60	7	Henderson, Henderson-Thompson, Chung-Pfost, Chen-Clayton, Sabbah, Copace	To choose the best models, besides checking R squared values and residual analysis, LS parameters should be unbiased, normally distributed, and its variances should be minimum	Bortolotti and Barrozo (2013)	37.7 (Earle and Jones, 1962)
Tobacco (Nicotiana tabacum L.)	Storage	Saturated solutions; 20-30 days	Reference values	105°С, 24h	De-, adsorption	One year in unprotected environment after harvest	10, 25, 40	10	Modified Chung-Pfost (desorption), Halsey, Oswin (adsorption), Henderson, GAB	Hysteresis effect, sigmoidal shape and type II curve observed; less hygroscopic at higher temperatures, as their sorption capacity decreased with the increase of temperature	Lazarov et al. (2020)	38.1 (Vaughan, 1970; Barclay and Earle, 1974; Eckey, 1974; Padley et al., 1994)
Sunflower (Helianthus annuus L.)	Drying	Stepped-drying	Water activity meter	130±3°C, 75 min	Desorption	Initial: 52% RH	16, 25, 39	9	Modified-Halsey, modified- Henderson, modified-Chung-Pfost, modified Oswin, GAB	Typical sigmoid shape; the safe moisture content tends to decrease with increasing oil content and temperature	Giner and Gely (2005)	41.54 (Eckey, 1954; Earle and Jones, 1962; Barclay and Earle, 1974; Robertson and Greene 1981; Rawson et al. 1984; Padley et al., 1994)
Sunflower (Helianthus annuus L.)	Drying	Saturated solutions	NA	105±3°C, 24h	Desorption	Initial: 0.164 (d.b.) MC	10, 25, 40, 55	8	Copace, Sigma-copace, Sigma-copace II, Copace 3, modified-Henderson, Chung-Pfoste, COP, Frend, modified-Oswin, Scop, Smith, Halsey, modified-Halsey, Harkins, Iglesias	Increasing the energy needed to remove water from the product, as desorption occurred; integral isosteric desorption heat was found to increase with decreasing water content; ihe desorption process was controlled by enthalpy, Gibbs free energy was positive for the studied temperatures and increased along the desorption process, proving to be a non-spontaneous process	Campos et al. (2019) )	41.54 (Eckey, 1954; Earle and Jones, 1962; Barclay and Earle, 1974; Robertson and Greene 1981; Rawson et al.., 1984; Padley et al., 1994)
Melon (Culocynthis citrullus L.)	Drying	Saturated solutions; 10-15 days	Reference values	103°C, 72h	Desorption	Initial: 21.6% (d.b.) MC	40, 50, 60, 70	9	Henderson, Chung-Pfost, modified-Halsey, Chen- Clayton, Henderson-Thompson	The exponential model in which the drying constant is a function of temperature and relative humidity was found adequate for predicting thin-layer drying	Ajibola (1989)	50 (Ajibola, 1989)
Garcinia kola, Terminalia superba,Terminalia ivorensis, Mansonia altissima,Entandrophragma angolense, Khaya anthotheca	Storage	Saturated solutions; 13-91 days	Water activity meter	103ºC, 17h	Desorbing and adsorbing seeds in one curve depend on their MC	Fresh	20	11	NA	Not all desiccation-sensitive species exhibit the monotonic shape or a simple rising curve; reversed sigmoidal shape characteristic	Asomaning et al. (2011)	_
Referenced	Storage	Saturated solutions	Reference values	95°C, 5d	Desorption	NA	5, 25, 45	≈ 7	NA	Once the critical water content for storage of a particular seed species is established through experimentation, the relative humidity at that water content can be determined by interpolating isotherms at the storage temperature of the study	Walters and Hill (1998)	_
Triticale (Triticosecale)	Drying	Saturated solutions; 10 weeks	Reference values	130°C, 19h	Desorption	Fresh: 13.35% (w. b.) MC	5, 23, 35	6	Modified- Henderson, modified- Chung-Pfost, modified- Oswin	All three models represented EMC/RH relationship very well	Agha et al. (2014)	_
Processing (food products)
Amaranth grains (Amaranthus cruentus L.)	Optimizing the post-harvest operations	Reference values from literature	Reference values	Referenced to literature	De-, adsorption, mean sorption	NA	25, 30, 35, 40, 45, 50, 55, 65, 70, 90	≈ 17	Modified- Henderson, modified- Chung–Pfost, modified-Halsey, modified-Oswin, GAB	Specific regressions for the GAB model were obtained for the experimental data at each temperature, a clear increase in the accuracy of predictions was reached	Pagano and Mascheroni (2005)	8.5 (Gamel et al., 2007)
Peppers (Capsicum chinense L.)	Study to assist design and optimization of storage systems	Saturated solutions	Reference values	Static gravimetric method	Adsorption	Fresh harvest: dried at 70°C, 48h; 3% (d.b.) MC	30, 35, 40	6	Chen-Clayton, Chung-Pfost, modified- Chung-Pfost, modified- Oswin, Smith	The latent heat of vaporization, differential enthalpy and entropy, and Gibbs free energy increased with the reduction in moisture content	Rodrigues et al. (2020)	23.5 (Jarret et al., 2013)
Safflower (Carthamus tinctorius)	Developing a new mathematical model (ANN); determination of monolayer water content values, isosteric heats of sorption, differential entropy, enthalpy-entropy compensation theory	Saturated solutions	NA	103°C, 24h	Adsorption	Fresh: 6.5% (d.b.) MC	25, 40, 60	7	Artificial neural network, Caurie, Chung-Pfost, GAB, Halsey, Henderson, Cohen, Modified BET, modified- Chung-Pfost, modified- Halsey, modified-Henderson, modified- Oswin, modified- Smith, Oswin, Peleg	Sigmoidal curve shapes; equilibrium moisture content at constant equilibrium water activity increased as temperature decreased; linear relation between enthalpy versus entropy; differential enthalpy and entropy decreased exponentially with an increase in equilibrium moisture content	Barati et al. (2016)	31.5 (Eckey, 1954; Vaughan, 1970)
Sunflower (Helianthus annuus L.) seeds, kernels	Study the EMC characteristics of high oleic sunflower seeds and kernels	Saturated solutions for 1-6 weeks depending on the material, relative humidity and temperature	Reference values	Oven drying method AOAC (1999)	Ad- ® desorption	Fresh: Ad: drying in 10°C, 2.6% (d.b.) MC; De: hydrating for 48h, 27.3% (d.b.) MC	10, 25, 40, 55	8	Modified-Henderson, Chung-Pfost, Halsey, GAB	The EMC of kernels (higher oil content) was lower than that of seeds; lower EMC for seeds and kernels at higher temperatures; Hysteresis effect for both seeds and kernels	Santalla and Mascheroni (2003)	41.54 (Eckey, 1954; Earle and Jones, 1962; Barclay and Earle, 1974; Robertson and Greene, 1981; Rawson et al., 1984; Padley et al., 1994)
(Camellia oleifera Abel.) seeds, kernels, shells	Isotherm determination of seeds, kernels and shells; study influence of oil content and thermodynamic properties on sorption isotherm	Equilibrating in constant temperature and humidity chambers	NA	Vacuum oven at 65°C	De-, adsorption	Fresh: initial: 54.3 ± 2.1% (w.b.) MC; Ad: vacuum-dried seeds at 50°C, 30h, 3% (w.b.) MC	10. 25, 40	8	Chung-Pfost, Oswin, GAB, Henderson, Peleg, Langmuir	Type II curve for seeds and kernels, Type I curve for shells; hysteresis of adsorption and the equilibrium moisture contents decrease with increasing oil content and temperature	Zhu et al. (2021)	41.6 (Earle and Jones, 1962)
Referenced materials of reviewed papers	Drying, shelf life prediction, setting storage conditions, packaging materials selection	Reference values	Reference values	Reference values	Reference values	Reference values	Reference values	Reference values	BET, GAB, Halsey, Henderson, Kuhn, Oswin, Lewicki, Smith, Peleg,	Based on the reviewed data, no equation could describe all products and the entire water activity range	Caballero-Cerón et al. (2015)	_
Referenced materials of reviewed papers	Uses and limitations of sorption isotherm models for food	Reference values	Reference values	Reference values	Reference values	Reference values	Reference values	Reference values	Langmuir, BET, Oswin, Smith, Halsey, Henderson, Iglesias-Chirife, GAB, Peleg,	The BET model's good result is limited to a_w < 0.45, only estimates monolayer moisture values; the GAB model's use is generalized by its theoretical bases, mathematical simplicity, ease to interpret and not frequently used when a_w > 0.93	Andrade et al. (2011)	_
Brazilian pine (Araucaria angustifolia)	Studying technological aspects	Drying and taking off samples, then, storing in polythene bags for 10 d at 0 °C; 48h	Water activity meter	105°C, until constant weight was obtained	Desorption	Initial: 88% (d.b.) MC	15, 25, 30, 40	≈ 10	GAB, Halsey, Peleg, Oswin, Chung-Pfost, Chen, Henderson, Chirife, Smith	Temperature has little effect on sorption behavior; the equilibrium moisture content decreased with decrease in water activity at constant temperature; the differential enthalpy decreased with increasing moisture content; the enthalpy– entropy compensation theory (isokinetic was satisfied	Cladera‐Olivera et al. (2008)	_

## Sheet: References
Agha, M. K. K., Lee, W. S., Bucklin, R. A., Teixeira, A. A., and Blount, A., R. (2014). Sorption isotherms for triticale seed. Am. Soc. Agric. Biol. Eng. 57, 901–904.
Ajibola, O. O. (1989). Thin-layer drying of melon seed. J. Food Eng. 9, 305-320.
Andrade, E. T., Figueira, V. G., Teixeira, L. P., Taveira, J. H. S., and Borém, F. M. (2017). Determination of the hygroscopic equilibrium and isosteric heat of aji chili pepper. Rev. Bras. Eng. Agríc. Amb. 54, 865–871.
Andrade, R. D., Lemus, R., and Perez, C. E., (2011). Models of sorption isotherms for food: uses and limitations. Vitae 18, 325–334.
Arslan-Tontul, S. (2020). Moisture sorption isotherm, isosteric heat and adsorption surface area of whole chia seeds. LWT – Food Sci. Technol. 119, 108859.
Barati, M., Zare, D., and Zomorodian, A. (2016). Moisture sorption isotherms and thermodynamic properties of safflower seed using empirical and neural network models. J. Food Meas. Charact. 10, 236–246.
Barclay, A. S., and Earle, F. R. (1974). Chemical analyses of seeds III: oil and protein content of 1253 species. Econ. Bot. 28, 178-236.
Bortolotti, C. T., and Barrozo, M. A. S. (2013). Searching the best equilibrium moisture equation for lettuce seeds using measures of curvature and bias. Food Sci. Nutr. 16, 422– 427.
Caballero-Cerón, C., Guerrero-Beltrán, J. A., Mújica-Paz, H., Torres, J. A., and Welti-Chanes, J. (2015). “Moisture sorption isotherms of foods: experimental methodology, mathematical analysis, and practical applications,” in Water Stress in Biological, Chemical, Pharmaceutical and Food Systems, eds. G. F. Gutiérrez-López, L. Alamilla-Beltrán, M. del Pilar Buera, J. Welti-Chanes, E. Parada-Arias,…
Chen, C. (2003). Moisture sorption isotherms of pea seeds. J. Food Eng. 58, 45–51.
Chen, C. (2006). Obtaining the isosteric sorption heat directly by sorption isotherm equations. J. Food Eng. 74, 178–185.
Chen, C. C., and Morey, R. V. (1989). Equilibrium relativity humidity (ERH) relationships for yellow-dent corn. Trans. ASAE 32, 999-1006.
Cladera‐Olivera, F., Pettermann, A. C., Noreña, C. P. Z., Wada, K., and Marczak, L. D. F. (2008). Thermodynamic properties of moisture desorption of raw pinhão (Araucaria angustifolia seeds). Int. J. Food Sci. Tech. 43, 900-907.
Earle, F. R., and Jones, Q. (1962). Analyses of seed samples from 113 plant families. Econ. Bot. 16, 221-250.
Eckey, E. W. (1954). Vegetable fats and oils. American Chemical Society Monograph Series no. 123. Reinhold Publishing Corporation, New York.
Eira, M. T. S., Walters, C., and Caldas, L. S. (1999). Water sorption properties in Coffea spp. seeds and embryos. Seed Sci. Res. 9, 321-330.
Eller, F. J., Moser, J. K., Kenar, J. A., and Taylor, S. L. (2010). Extraction and analysis of tomato seed oil. J. Am. Oil Chem. Soc. 87, 755-762.
Ferreira Junior, W. N., Resende, O., de Sousa, K. A., Gavazza, M. I. A., Sales, J. de F., and de Oliveira, D. E. C. (2020). Desorption isotherms and isosteric heat of araticum (Annona crassiflora Mart.) seeds. Rev. Bras. Eng. Agric. e Ambient. 24, 630–636.
Gamel, T. H., Mesallam, A. S., Damir, A. A., Shekib, L. A., and Linssen, J. P. (2007). Characterization of Amaranth seed oils. J. Food Lipids 14, 323-334.
Goneli, A. L., Corrêa, P. C., de Oliveira, G. H., Resende, O., and Mauad, M. (2016). Moisture sorption isotherms of castor beans. Part 1: Mathematical modeling and hysteresis. Rev. Bras. Eng. Agríc. Amb. 20, 751-756.
Gunstone, F. D., Steward, S. R., Cornelius, J. A. and Hammonds, T. W. (1972). New tropical seed oils IV. Component acids of leguminous and other seed oils including useful sources of crepenynic and dehydrocrepenynic acid. J. Sci. Food Agr. 23, 53-60.
Hacıseferoǧulları, H., Gezer, İ., Bahtiyarca, Y., and Mengeş, H. O. (2003). Determination of some chemical and physical properties of Sakız faba bean (Vicia faba L. Var. major). J. Food Eng. 60, 475-479.
Hagemann, J. M., Earle, F. R., Wolff, I. A., and Barclay, A. S. (1967). Search for new industrial oils. XIV. Seed oils of Labiatae. Lipids 2, 371-380.
Hassini, L., Bettaieb, E., Desmorieux, H., and Sandoval, S. (2015). Desorption isotherms and thermodynamic properties of prickly pear seeds. Ind. Crops Prod. 67, 457–465.
Hay, F. R., and Timple, S. (2016). The longevity of desorbing and adsorbing rice seeds. Seed Sci. Res. 26, 306-316.
Hay, F. R., Merritt, D. J., Soanes, J. A., and Dixon, K. W. (2010). Comparative longevity of Australian orchid (Orchidaceae) seeds under experimental and low temperature storage conditions. Bot. J. Linn. Soc. 164, 26-41.
Jarret, R. L., Levy, I. J., Potter, T. L., and Cermak, S. C. (2013). Seed oil and fatty acid composition in Capsicum spp. J. Food Compos. Anal. 30, 102-108.
Jones, Q. and Earle, F. R. (1966). Chemical analyses of seeds II: oil and protein content of 759 species. Econ. Bot. 20, 127-155.
Lazarov, L., Toshkov, N., Ivanova, T., Popova, V., and Menkov, N. (2020). Sorption isotherms of tobacco (Nicotiana tabacum L.) seeds. In E3S Web of Conferences (Vol. 207, p. 01018). EDP Sciences.
Li, X., Cao, Z., Wei, Z., Feng, Q., and Wang, J. (2011). Equilibrium moisture content and sorption isosteric heats of five wheat varieties in China. J. Stored Prod. Res. 47, 39–47.
Lopes, R. M., Silva, J. P. D., Vieira, R. F., Silva, D. B. D., Gomes, I. D. S., and Agostini-Costa, T. D. S. (2012). Composição de ácidos graxos em polpa de frutas nativas do cerrado. Rev. Bras. Frutic. 34, 635-640.
Majd, K. M., Karparvarfard, S. H., Jafarpour, A., and Khosrow, F. (2013). Thermodynamic of water sorption of grape seed : temperature effect of sorption isotherms and thermodynamic characteristics. Food Biophys. 8, 1–11.
Maleki Majd, K. M., Karparvarfard, S. H., Farahnaky, A., Jafarpour, K. (2013). Thermodynamic of water sorption of grape seed: temperature effect of sorption isotherms and themodynamic characteristics. Food Biophys. 9, 1-11.
Mallek-Ayadi, S., Bahloul, N., and Kechaou, N. (2020). Mathematical modelling of water sorption isotherms and thermodynamic properties of Cucumis melo L. seeds. LWT - Food Sci. Technol. 131, 109727.
Menkov, N. D. (2000). Moisture sorption isotherms of lentil seeds at several temperatures. J. Food Eng. 44, 205–211.
Miranda, M., Vega-Gálvez, A., Sanders, M., López, J., Lemus-Mondaca, R., Martínez, E. and Di Scala, K., (2012). Modelling the water sorption isotherms of quinoa seeds (Chenopodium quinoa Willd.) and determination of sorption heats. Food Bioprocess Tech. 5, 1686-1693.
Moreira, R., Chenlo, F., Prieto, D. M., and Torres, M. D. (2012). Water adsorption isotherms of chia (Salvia hispanica L.) seeds. Food Bioprocess Tech. 5, 1077-1082.
Padley, F. B., Gunstone, F. D., and Harwood, J. L. (1994). "Occurrence and characteristics of oils and fats," in The Lipid Handbook (2nd Edn.), ed. F. D. Gunstone, J. L. Harwood, and F. B. Padley (London; New York: Chapman and Hall), 47-146.
Quirijns, E. J., van Boxtel, A. J. B., van Loon, W. K. P., and van Straten, G. (2005a). An improved experimental and regression methodology for sorption isotherms. 185, 175–185.
Quirijns, E. J., van Boxtel, A. J. B., van Loon, W. K. P., and van Straten, G. (2005b). Sorption isotherms, GAB parameters and isosteric heat of sorption. J. Sci. Food Agric. 85, 1805–1814. doi:10.1002/jsfa.2140.
Raji, A. O., and Ojediran, J. O. (2011). Moisture sorption isotherms of two varieties of millet. Food Bioprod. Process. 89, 178–184
Rawson, H. M., Dunstone, R. L., Long, M. J., and Begg, J. E. (1984). Canopy development, light interception and seed production in sunflower as influenced by temperature and radiation. Aust. J. Plant Physiol. 11, 255-265.
Robertson, J. A., and Greene, V. E. (1981). Effect of planting date on sunflower seed oil content, fatty acid composition and yield in Florida. J. Am. Oil Chem. Soc. 58, 698-701.
Rodrigues, K. C., da Silva, H. W., Silva, I. L., Dos Santos, S. G. F., da Silva, D. P., and Rodovalho, R. S., (2020). Isotherms and thermodynamic properties of water adsorption in ‘cumari-do-pará’ pepper seeds. Rev. Bras. Eng. Agric. e Ambient. 24, 280–285.
Royal Botanic Gardens Kew (2022). Seed Information Database (SID). Version 7.1. Available from: http://data.kew.org/sid/ (March 2022)
Santalla, E. M., and Mascheroni, R. H. (2003). Equilibrium moisture characteristics of high oleic sunflower seeds and kernels. Dry. Technol. 21, 147-163.
Schippers, R. R. (2000). African Indigenous Vegetables: an Overview of Cultivated Species. Natural Resources Institute/ACP-EU Technical Centre for Agricultural and Rural Cooperation, Chatham, UK.
Silva, H. W. D., Rodovalho, R. S., and Silva, I. L. (2018). Hysteresis and thermodynamic properties of water sorption in ‘Malagueta’pepper seeds. Rev. Bras. Eng. Agríc. Amb. 22, 658-663.
Sogi, D. S., Shivhare, U. S., Garg, S. K., and Bawa, A. S. (2003). Water sorption isotherm and drying characteristics of tomato seeds. Biosyst. Eng. 84, 297–301.
Sun, W. Q., Koh, D. C. Y., and Ong, C. M. (1997). Correlation of modified water sorption properties -with the decline of storage stability of osmoticallyprimed seeds of Vigna radiata (L.) Wilczek. Seed Sci. Res. 7, 391–397. doi: 10.1017/S0960258500003809
Vertucci, C. W., and Leopold, A. C. (1984). Bound water in soybean seed and its relation to respiration and imbibitional damage. Plant Physiol. 75, 114–117.
Vertucci, C. W., and Leopold, A. C. (1987). Water binding in legume seeds. Plant Physiol. 85, 224-231.
Walters, C., and Hill, L.M., 1998. Water sorption isotherms of seeds from ultradry experiments. Seed Sci. Res. Available at https://www.bioversityinternational.org/fileadmin/bioversity/publications/Web_version/243/ch13.htm
Walters, C., Rao, N. K., and Xiaorong, H. (1998). Optimizing seed water content to improve longevity in ex situ genebanks. Seed Sci. Res. Available at https://www.bioversityinternational.org/fileadmin/bioversity/publications/Web_version/243/ch05.htm.
Wang, P., Fu, N., Li, D., and Wang, L. (2017). Predicting storage conditions for rice seed with thermodynamic analysis. Int. J. Food Eng. 13, 20170129. https://doi.org/10.1515/ijfe-2017-0129.
Whitehouse, K. J., Hay, F. R., and Ellis, R. H. (2015). Increases in the longevity of desiccation-phase developing rice seeds: Response to high-temperature drying depends on harvest moisture content. Ann. Bot. 116, 247–259.
Yang, W., Sokhansanj, S., Cenkowski, S., Tang, J., and Wu, Y. (1997). A general model for sorption hysteresis in food materials. J. Food Eng. 33, 421–444.
Zeymer, J. S., Corrêa, P. C., de Oliveira, G. H. H., Baptestini, F. M., and Freitas, R. C. P. (2017). Desorption isotherms of lactuca sativa seeds. Rev. Bras. Eng. Agríc. Amb. 21, 568–572.
Zeymer, J. S., Corrêa, P. C., Oliveira, G. H. H., Baptestini, F. M., and Campos, R. C. (2019). Mathematical modeling and hysteresis of sorption isotherms for paddy rice grains. Eng. Agríc. 39, 524–532.
Zhu, G., Jin, Q., Liu, Y., Lin, Y., Wang, J., and Li, X. (2021). Moisture sorption and thermodynamic properties of camellia oleifera seeds as influenced by oil content. Int. J. Agric. Biol. Eng. 14, 251–258.
