# Supplementary material for: Seed Moisture Isotherms, Sorption Models, and Longevity
Source: Front Plant Sci. 2022 Jun 2;13:891913. doi: 10.3389/fpls.2022.891913 (PMC9201756; doi:10.3389/fpls.2022.891913)
Supplement: Supplementary file 2 [file Table_2.XLSX]

## Sheet: Feuil1
Supplementary Table 2 Effect of change in pressure on water activity based on Okos et al. (2019). Example calculated for Arabidopsis seeds under EPPO storage at 20°C and 35% RH, as described by Buijs et al. (2020). The predicted Aw of the seeds under elevated pressure (EPPO storage) is 40.5%.
ln (aw2/aw1)= (VL/RT)*(P2-P1)
VL	molar volume of water	18			RT	24053
R	gas constant	82.05			VL/RT	0.000748349
T	temperature (K)	293.15			P2-P1	196.385
					(VL/RT)*(P2-P1)	0.146964	=ln(aw1/aw2)
Aw1	(i.e., 35% eRH)	0.35			aw1/aw2	1.15831
Aw2					aw2	0.405409
P1	Ambient pressure (atm)	1
P2	EPPO pressure (atm)	197.385
References
Buijs, G., Willems, L. A. J., Kodde, J., Groot, S. P. C., and Bentsink, L. (2020). Evaluating the EPPO method for seed longevity analyses in Arabidopsis. Plant Sci. 301, 110644. doi: 10.1016/j.plantsci.2020.110644
Okos, M. R., Campanella, O., Narsimhan, G., Singh, R. K., and Weitnauer, A. C. (2019). “Food dehydration,” in Handbook of Food Engineering (eds. D. R. Heldman, D. B. Lund, S. M. Sabliov), 3rd Edition (Boca Raton, Florida: CRC Press), 799-949.
